# Supplementary material for: Immunotherapy and Overall Survival Among Patients With Advanced Non–Small Cell Lung Cancer and Obesity
Source: PubMed Central journal article supplement (PMC11297387; doi:10.1001/jamanetworkopen.2024.25363), 2024-08-02
Supplement: jamanetwopen-e2425363-s001.pdf [file jamanetwopen-e2425363-s001.pdf]

## Supplementary Online Content

Ihara Y, Sawa K, Imai T, et al. Immunotherapy and overall survival among patients with advanced non–small cell lung cancer and obesity. *JAMA Netw Open*. 2024;7(8):e2425363. doi:10.1001/jamanetworkopen.2024.25363

**eMethods 1.** Definitions of Patients With NSCLC Who Received First-Line Therapy

**eMethods 2.** Patient Exclusion Criteria

**eMethods 3.** Definitions of Patient Demographic and Clinical Characteristics

**eMethods 4.** Detailed Information on Each Analysis

**eTable 1.** *ATC* Codes of Anticancer Drugs for Driver Mutation Identification

**eTable 2.** List of Codes for *ICD-10* and Medical Procedures

**eTable 3.** Characteristics of Patients With NSCLC Categorized According to Therapy Types

**eTable 4.** Characteristics of Patients With NSCLC Categorized According to Age

**eTable 5.** Characteristics of Patients With NSCLC Categorized According to Sex

**eTable 6.** Characteristics of Patients With NSCLC Categorized According to Details on Therapy Types

**eTable 7.** Characteristics of NSCLC Patients With and Without BMI Values

**eFigure 1.** Distribution of BMI

**eFigure 2.** Hazard Functions of Mortality for Patients Who Received ICI Therapy or Conventional Chemotherapy and Difference of Hazard of Mortality Plotted Against BMI in Sensitivity Analyses

**eFigure 3.** Hazard of Mortality as a Function of BMI Stratified Based on Details on Therapy Types

This Supplementary material has been provided by the authors to give readers additional information about their work.

**eMethods 1.** Definitions of patients with NSCLC who received first-line therapy

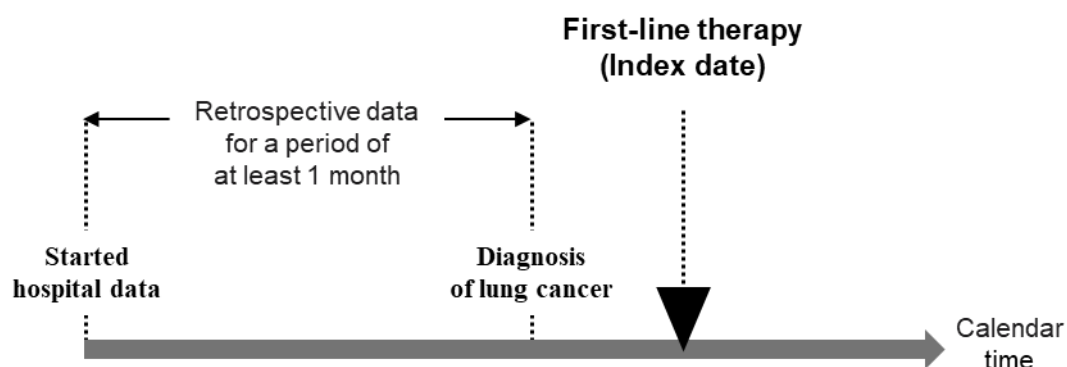

To identify patients who received first-line therapy after lung cancer diagnosis, we included those with a minimum 1-month interval from database entry to the date of first lung cancer diagnosis. In our study, the initiation of chemotherapy after the diagnosis of lung cancer was recorded as the index date.

Abbreviations: NSCLC, non-small cell lung cancer

**eMethods 2. Patient exclusion criteria**

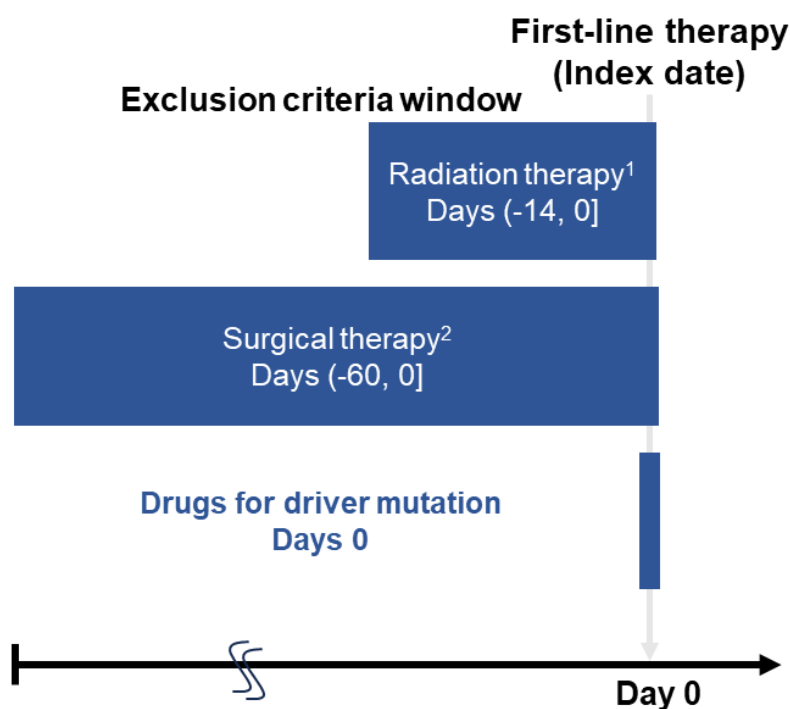

<sup>1</sup> List of codes for radiation therapy

|                   | Medical procedures codes                                                                                                                                                                             |
|-------------------|------------------------------------------------------------------------------------------------------------------------------------------------------------------------------------------------------|
| Radiation therapy | 180019410, 180019710, 180020710, 180020810, 180020910, 180021010, 180021110, 180021210, 180021310, 180021410, 180021510, 180021610, 180021710, 180021810, 180021910, 180022010, 180026750, 180031910 |

<sup>2</sup> List of codes for surgical therapy

|                  | Medical procedures codes                                                                                                                                            |
|------------------|---------------------------------------------------------------------------------------------------------------------------------------------------------------------|
| Surgical therapy | 150357810, 150357910, 150358010, 150358110, 150358210, 150358310, 150358410, 150358510, 150358610, 150358710, 150358810, 150374510, 150386610, 150406110, 150414410 |

Patients were excluded from the study if they met any of the following criteria: (1) received chemoradiotherapy within 14 days before the index date; (2) received adjuvant chemotherapy within 60 days before the index date; (3) received a therapeutic agent targeting a driver mutation on the index date.

### eMethods 3. Definitions of patient demographic and clinical characteristics

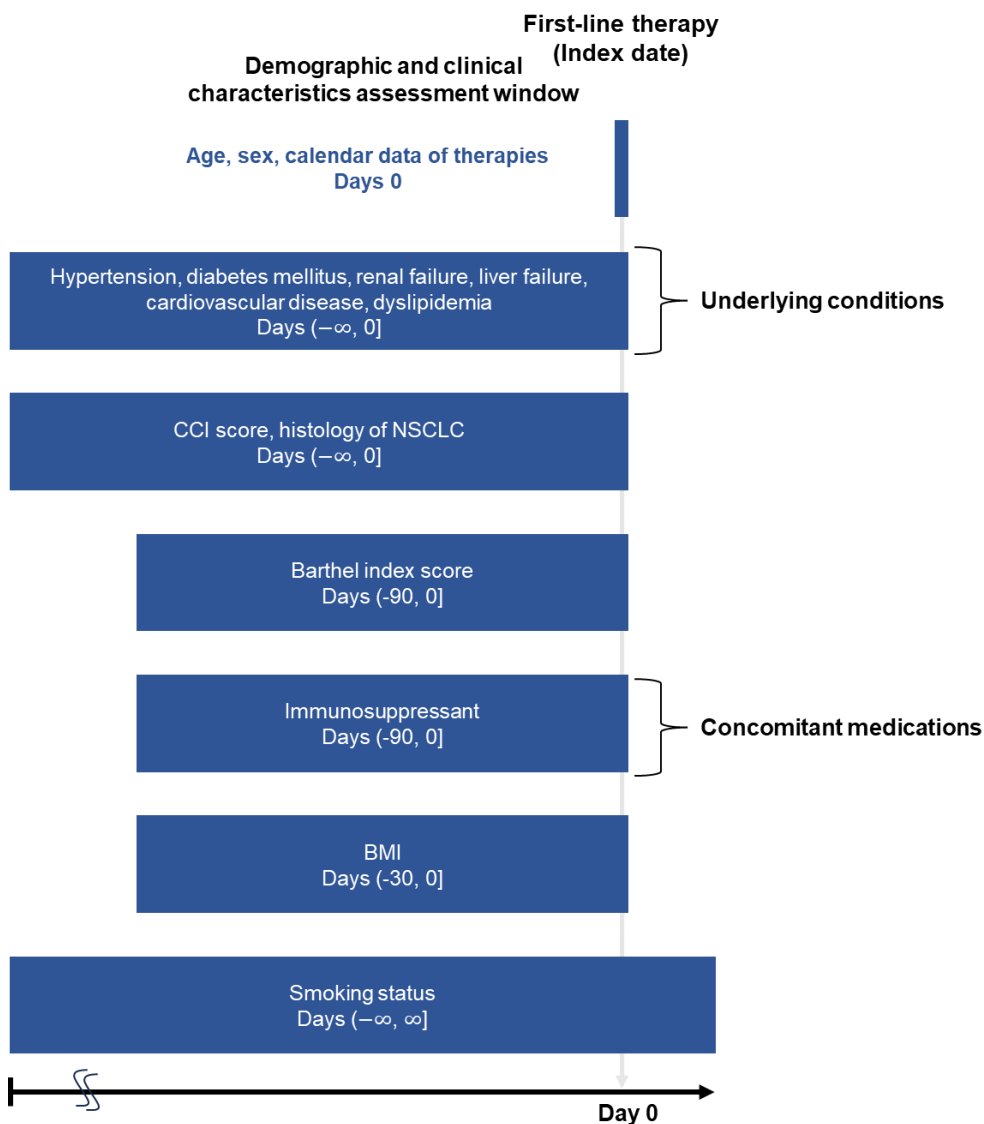

Based on the index date, age, sex, and calendar dates of therapies were collected. BMI was collected within 1 month prior to the index date. Barthel index score and medications (immunosuppressant) were collected within 3 months prior to the index date. Additionally, data available before the index date including underlying conditions (hypertension, diabetes mellitus, renal failure, liver failure, cardiovascular disease, dyslipidemia), Charlson comorbidity index (CCI) score, and histology of NSCLC (squamous/non-squamous) were collected. Smoking status was collected using data before and also after the index date because the information regarding past smoking history may appear after the index date.

Abbreviations: NSCLC, non-small cell lung cancer; CCI, Charlson comorbidity index; BMI, body mass index

## eMethods 4. Detailed information on each analysis

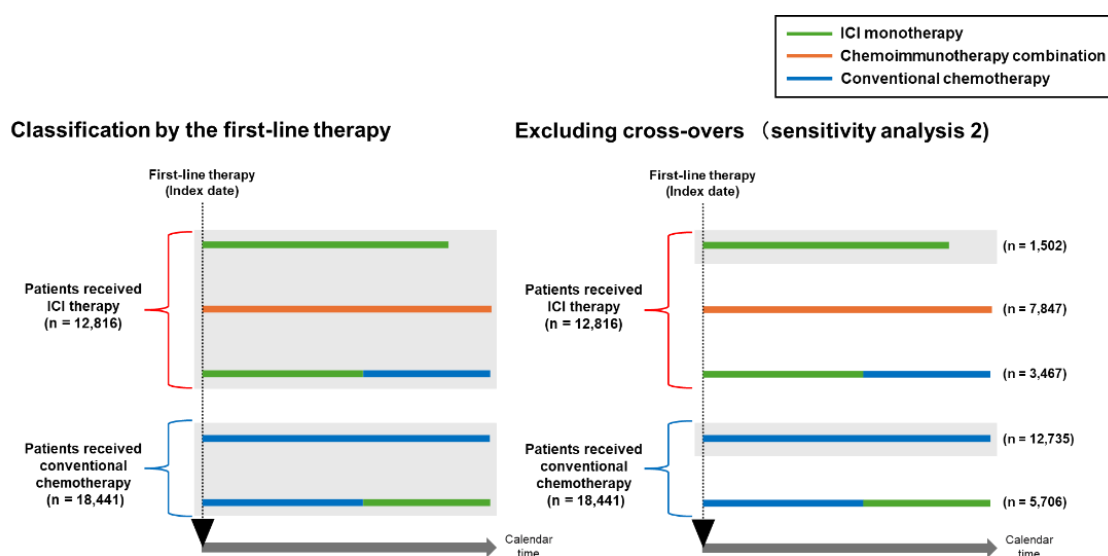

The analysis population for each therapy is grey-filled.

### Main analysis of Classification by the first-line therapy

Method which is labeled as “Classification by the first-line therapy” analyzed patients’ data for the entire follow-up period according to their first choice of ICI therapy or conventional chemotherapy after the index date ignoring mid-course switching their therapy.

### Subgroups analyses by age category and sex

To account for the potential influence of age and sex on the relationship between BMI and mortality, the main analyses were repeated within subgroups of patients categorized by age ( $\leq 64$  years, 65–79 years, and  $\geq 80$  years) and sex (male and female).

### Sensitivity analysis 1 on length of period before lung cancer

Two sensitivity analyses were conducted to examine the robustness of the main results by changing the following definitions. We included those with a minimum 3-month interval from database entry to the date of first lung cancer diagnosis (sensitivity analysis 1).

### Sensitivity analysis 2 with censoring at time of regimen cross-over

As a sensitivity analysis 2, we also conducted a method of “Excluding cross-overs” in which we excluded patients who switched over their regimens during a follow-up period. This sensitivity analysis included patients who received ICI monotherapy and conventional chemotherapy. If a patient receiving ICI monotherapy, started conventional chemotherapy, he or she was excluded from the analysis. Similarly, if a

patient receiving conventional chemotherapy, started ICI therapy, he or she was excluded from the analysis. Patients receiving ICI monotherapy (n = 1,502) and conventional chemotherapy (n = 12,735) in the "Excluding cross-over" shown below were included (sensitivity analysis 2).

### Sensitivity analysis 3 in missing value completion of BMI

4,696 patients were excluded from the analysis due to missing BMI information. Missing data on BMI were caused by participating hospitals' decision on providing or not providing BMI information to MDV. Patients' baseline characteristics among patients with missing BMI were compared between ICI and conventional chemotherapy groups (Appendix eTable 6). The distributions of all baseline characteristics appeared to be similar between the two cohorts. We also have added a sensitivity analysis using multiple imputation methods. Multiple imputation with predictive mean matching was used to address missing values of BMI in addition to Barthel index score and smoking status, and analysis was performed on the imputed dataset (sensitivity analysis 3).

### Additional analysis

As an additional analysis, ICI therapy was further divided into chemoimmunotherapy combination (combination therapy of ICI and conventional chemotherapy) and ICI monotherapy (including in nivolumab + ipilimumab). The estimated hazard function of mortality was plotted on a log scale against continuous BMI values.

Abbreviations: ICI, Immune checkpoint inhibitor; BMI, body mass index

**eTable 1.** ATC codes of anticancer drugs for driver mutation identification

| KEGG DGROUP     | ATC codes | Anticancer drugs names |
|-----------------|-----------|------------------------|
| EGFR inhibitors | L01EB01   | Gefitinib              |
|                 | L01EB02   | Erlotinib              |
|                 | L01EB03   | Afatinib               |
|                 | L01EB04   | Osimertinib            |
|                 | L01EB07   | Dacomitinib            |
| BRAF inhibitors | L01EC02   | Dabrafenib             |
|                 | L01EE01   | Trametinib             |
| ALK inhibitors  | L01ED01   | Crizotinib             |
|                 | L01ED02   | Ceritinib              |
|                 | L01ED03   | Alectinib              |
|                 | L01ED04   | Brigatinib             |
|                 | L01ED05   | Lorlatinib             |
| MET inhibitors  | L01EX21   | Tepotinib              |
|                 | L01EX17   | Capmatinib             |
| RET inhibitor   | L01EX22   | Selpercatinib          |
| NTRK inhibitors | L01EX14   | Entrectinib            |
|                 | L01EX12   | Larotrectinib          |

Abbreviations: ATC, Anatomical therapeutic chemical; EGFR, epidermal growth factor receptor; BRAF, B-Raf serine-threonine kinase; ALK, anaplastic lymphoma kinase; MET, mesenchymal epithelial transition; RET, rearranged during transfection; NTRK, neurotrophic tyrosine receptor kinase

**eTable 2.** List of codes for *ICD-10* and medical procedures

| Underlying conditions  | ICD-10 codes                                                                                                                                                                                                                                                                                                                                                                                                                                                                                                                                                                                                                                                                                                                                                                                                                                                                                                                                                                                                                                                                                                                                                                                                                                                                                                                                                            |
|------------------------|-------------------------------------------------------------------------------------------------------------------------------------------------------------------------------------------------------------------------------------------------------------------------------------------------------------------------------------------------------------------------------------------------------------------------------------------------------------------------------------------------------------------------------------------------------------------------------------------------------------------------------------------------------------------------------------------------------------------------------------------------------------------------------------------------------------------------------------------------------------------------------------------------------------------------------------------------------------------------------------------------------------------------------------------------------------------------------------------------------------------------------------------------------------------------------------------------------------------------------------------------------------------------------------------------------------------------------------------------------------------------|
| Hypertension           | I10, I11, I12, I13, I14, I15                                                                                                                                                                                                                                                                                                                                                                                                                                                                                                                                                                                                                                                                                                                                                                                                                                                                                                                                                                                                                                                                                                                                                                                                                                                                                                                                            |
| Diabetes mellitus      | E10, E11, E12, E13, E14                                                                                                                                                                                                                                                                                                                                                                                                                                                                                                                                                                                                                                                                                                                                                                                                                                                                                                                                                                                                                                                                                                                                                                                                                                                                                                                                                 |
| Renal failure          | I12.0, I13.1, N03.2–N03.7, N05.2–N05.7, N18, N19, N25.0, Z49.0–Z49.2, Z94.0, Z99.2                                                                                                                                                                                                                                                                                                                                                                                                                                                                                                                                                                                                                                                                                                                                                                                                                                                                                                                                                                                                                                                                                                                                                                                                                                                                                      |
| Liver failure          | B18.x, K70.0–K70.3, K70.9, K71.3–K71.5, K71.7, K73, K74, K76.0, K76.2–K76.4, K76.8, K76.9, Z94.4, I85.0, I85.9, I86.4, I98.2, K70.4, K71.1, K72.1, K72.9, K76.5, K76.6, K76.7                                                                                                                                                                                                                                                                                                                                                                                                                                                                                                                                                                                                                                                                                                                                                                                                                                                                                                                                                                                                                                                                                                                                                                                           |
| Cardiovascular disease | I01–I02.0, I05–I13, I20–I25, I27, I30–I51, I60–I69                                                                                                                                                                                                                                                                                                                                                                                                                                                                                                                                                                                                                                                                                                                                                                                                                                                                                                                                                                                                                                                                                                                                                                                                                                                                                                                      |
| Dyslipidemia           | E785                                                                                                                                                                                                                                                                                                                                                                                                                                                                                                                                                                                                                                                                                                                                                                                                                                                                                                                                                                                                                                                                                                                                                                                                                                                                                                                                                                    |
| Medication             | Medical procedure codes                                                                                                                                                                                                                                                                                                                                                                                                                                                                                                                                                                                                                                                                                                                                                                                                                                                                                                                                                                                                                                                                                                                                                                                                                                                                                                                                                 |
| Immunosuppressant      | 620008997, 620009119, 621133002, 622023001, 622746800, 666210001, 610409338, 620008070, 620008106, 620008107, 620008509, 620008510, 620008511, 620008512, 620008513, 620008514, 620009440, 620009441, 620506801, 621867201, 621884302, 621884303, 621890601, 621965201, 621969902, 622011801, 622026201, 622053401, 622065002, 622102901, 622102902, 622102903, 622109401, 622646301, 614210169, 620005941, 622181601, 640453101, 644210037, 614210098, 620007515, 622221301, 644210048, 644210049, 620006808, 622093601, 622509701, 622509801, 622608801, 622608901, 622609001, 629911301, 629911401, 629913601, 629913701, 640462006, 622378801, 622577001, 622590801, 622596901, 622651501, 620002479, 620007231, 621934101, 622003901, 622242701, 622624701, 622635001, 622635101, 622635201, 629906301, 622676001, 622676101, 622676201, 622676301, 629900301, 629900501, 622070002, 622675801, 622224501, 622654701, 622508101, 622508201, 622046501, 622554701, 622123701, 622639401, 622403701, 622518901, 622608101, 629911101, 620006184, 620006804, 620006805, 620008445, 620008829, 622510201, 613990075, 613990088, 620004279, 620006560, 629916101, 622533801, 622533901, 622534001, 622793801, 622793901, 621984301, 620004854, 620004855, 620004856, 620008850, 610443018, 610443019, 610443020, 610443021, 613990074, 613990085, 613990086, 620002641, |



| Medication        | Procedure codes                                                                                                                                                                                                                                                                                                                                                                                                                                                                                                                                                                                                                                                                                                                                                                                                                                                                                                                                                                                                                                                                                                                                                                                                                                                                                                                                                                                                                                                                                                                                                                                                                                                                                                                                                                                                                                                                                                                                                            |
|-------------------|----------------------------------------------------------------------------------------------------------------------------------------------------------------------------------------------------------------------------------------------------------------------------------------------------------------------------------------------------------------------------------------------------------------------------------------------------------------------------------------------------------------------------------------------------------------------------------------------------------------------------------------------------------------------------------------------------------------------------------------------------------------------------------------------------------------------------------------------------------------------------------------------------------------------------------------------------------------------------------------------------------------------------------------------------------------------------------------------------------------------------------------------------------------------------------------------------------------------------------------------------------------------------------------------------------------------------------------------------------------------------------------------------------------------------------------------------------------------------------------------------------------------------------------------------------------------------------------------------------------------------------------------------------------------------------------------------------------------------------------------------------------------------------------------------------------------------------------------------------------------------------------------------------------------------------------------------------------------------|
| Immunosuppressant | 620002728, 620002729, 620009313, 620009314, 620882601,<br>620894001, 621326201, 621483603, 621483703, 621637802,<br>621674701, 621674801, 621677601, 621677701, 621685602,<br>621732201, 621738001, 621743306, 621743406, 622043804,<br>622056201, 622056301, 622056401, 622741800, 622741900,<br>622742000, 622363701, 610409342, 610443059, 610451009,<br>610451010, 613990096, 620008437, 620008438, 620008439,<br>622047401, 622232201, 622232301, 622270501, 622270601,<br>622280901, 622281001, 622281101, 622281201, 622281301,<br>622370001, 622370101, 622384301, 622384303, 622384401,<br>622384403, 622384501, 622384503, 622384601, 622384603,<br>622384703, 622437901, 622438001, 622438101, 622438601,<br>622438701, 622580901, 622590901, 643990141, 622242601,<br>622573701, 622573801, 622440601, 622587101, 622587201,<br>622587301, 622587401, 622678101, 622678201, 610432045,<br>622272501, 622283901, 622440801, 613990069, 613990070,<br>621993201, 621993301, 622008902, 622009001, 622009002,<br>622518701, 622518801, 611140861, 611140862, 620003877,<br>620003878, 620003879, 620003880, 622002901, 622265701,<br>622491601, 622183501, 622184501, 620006160, 620006895,<br>620007135, 620942001, 610453008, 610453065, 610463004,<br>620004897, 621442802, 621442905, 621443001, 621443002,<br>622039002, 622103601, 622103602, 622161402, 622173801,<br>622173901, 622746900, 622747000, 622833801, 622596601,<br>622596701, 622662001, 622662101, 622242201, 622242301,<br>622830601, 622830701, 610422247, 610433106, 610433156,<br>620000180, 620000181, 620006092, 620008052, 620942203,<br>620942401, 620943101, 622108401, 622108402, 622743000,<br>622743100, 620005116, 620005117, 610432016, 620002151,<br>620004005, 620004082, 620004083, 620004084, 620006686,<br>621622602, 621642203, 621734801, 622581501, 622630501,<br>622634501, 622642401, 622742200, 622742300, 622841001,<br>622869601, 620000416, 620000417, 620000418 |

Abbreviations: ICD-10; International Classification of Diseases 10th Revision

**eTable 3.** Characteristics of patients with NSCLC categorized according to therapy type

|                                                     | ICI therapy<br>(n = 12,816) | Conventional chemotherapy<br>(n = 18,441) |
|-----------------------------------------------------|-----------------------------|-------------------------------------------|
| Patient characteristics                             | No. (%)                     | No. (%)                                   |
| Age, mean (SD), y                                   | 70.2 (9.1)                  | 70.2 (8.9)                                |
| BMI, mean (SD), kg/m <sup>2</sup>                   | 21.9 (3.5)                  | 22.1 (3.5)                                |
| Sex                                                 |                             |                                           |
| Male                                                | 10,287 (80.3%)              | 14,139 (76.7%)                            |
| Female                                              | 2,529 (19.7%)               | 4,302 (23.3%)                             |
| Smoking status (current/past) <sup>a</sup>          | 10,117 (81.7%)              | 13,793 (77.7%)                            |
| Barthel index score<br>(perfect score) <sup>a</sup> | 10,893 (88.9%)              | 16,027 (90.3%)                            |
| CCI score                                           |                             |                                           |
| 0–2                                                 | 4,368 (34.1%)               | 7,859 (42.6%)                             |
| ≥ 3                                                 | 8,448 (65.9%)               | 10,582 (57.4%)                            |
| Histology of NSCLC                                  |                             |                                           |
| Squamous                                            | 2,317 (18.1%)               | 3,062 (16.6%)                             |
| Non-Squamous                                        | 10,499 (81.9%)              | 15,379 (83.4%)                            |
| Underlying conditions                               |                             |                                           |
| Hypertension                                        | 5,809 (45.3%)               | 7,457 (40.4%)                             |
| Diabetes mellitus                                   | 2,709 (21.1%)               | 4,074 (22.1%)                             |
| Renal failure                                       | 591 (4.6%)                  | 631 (3.4%)                                |
| Liver failure                                       | 2,198 (17.2%)               | 2,706 (14.7%)                             |
| Cardiovascular disease                              | 4,272 (33.3%)               | 5,356 (29.0%)                             |
| Dyslipidemia                                        | 3,176 (24.8%)               | 4,173 (22.6%)                             |
| Medication                                          |                             |                                           |
| Immunosuppressant                                   | 111 (0.9%)                  | 512 (2.8%)                                |
| Calendar dates of therapies                         |                             |                                           |
| 2015/12/01–2019/12/31                               | 4,292 (33.5%)               | 11,931 (64.7%)                            |
| 2020/01/01–2023/01/31                               | 8,524 (66.5%)               | 6,510 (35.3%)                             |

<sup>a</sup> For Smoking status, and Barthel index, there were missing data for 3.6%, and 4.0% of the total patients, respectively.

Abbreviations: NSCLC, non-small cell lung cancer; ICI, Immune checkpoint inhibitor; SD, standard deviation; BMI, body mass index; CCI, Charlson comorbidity index

**eTable 4.** Characteristics of patients with NSCLC categorized according to age

| Patient characteristics                | Age ≤ 64 years             |                                             | Age 65–79 years            |                                              | Age ≥ 80 years             |                                             |
|----------------------------------------|----------------------------|---------------------------------------------|----------------------------|----------------------------------------------|----------------------------|---------------------------------------------|
|                                        | ICI therapy<br>(n = 2,835) | Conventional<br>chemotherapy<br>(n = 3,938) | ICI therapy<br>(n = 8,290) | Conventional<br>chemotherapy<br>(n = 12,190) | ICI therapy<br>(n = 1,691) | Conventional<br>chemotherapy<br>(n = 2,313) |
|                                        | No. (%)                    | No. (%)                                     | No. (%)                    | No. (%)                                      | No. (%)                    | No. (%)                                     |
| Age, mean (SD), y                      | 56.9 (6.4)                 | 57.1 (6.7)                                  | 72.2 (3.9)                 | 72.1 (4.0)                                   | 82.9 (2.6)                 | 82.5 (2.4)                                  |
| BMI, mean (SD), kg/m <sup>2</sup>      | 22.1 (3.7)                 | 22.3 (3.8)                                  | 21.9 (3.5)                 | 22.1 (3.4)                                   | 22.1 (3.3)                 | 22.2 (3.2)                                  |
| Sex                                    |                            |                                             |                            |                                              |                            |                                             |
| Male                                   | 2,239 (79.0%)              | 2,874 (73.0%)                               | 6,733 (81.2%)              | 9,492 (77.9%)                                | 1,315 (77.8%)              | 1,773 (76.7%)                               |
| Female                                 | 596 (21.0%)                | 1,064 (27.0%)                               | 1,557 (18.8%)              | 2,698 (22.1%)                                | 376 (22.2%)                | 540 (23.3%)                                 |
| Smoking status<br>(current/past)       | 2,308 (83.9%)              | 2,946 (77.7%)                               | 6,610 (82.6%)              | 9,321 (79.4%)                                | 1,199 (73.9%)              | 1,526 (69.0%)                               |
| Barthel index score<br>(perfect score) | 2,501 (91.7%)              | 3,543 (93.0%)                               | 7,038 (88.8%)              | 10,587 (90.2%)                               | 1,354 (84.4%)              | 1,897 (86.5%)                               |
| CCI score                              |                            |                                             |                            |                                              |                            |                                             |
| 0–2                                    | 899 (31.7%)                | 1,732 (44.0%)                               | 2,864 (34.5%)              | 5,210 (42.7%)                                | 605 (35.8%)                | 917 (39.6%)                                 |
| ≥ 3                                    | 1,936 (68.3%)              | 2,206 (56.0%)                               | 5,426 (65.5%)              | 6,980 (57.3%)                                | 1,086 (64.2%)              | 1,396 (60.4%)                               |
| Histology of NSCLC                     |                            |                                             |                            |                                              |                            |                                             |
| Squamous                               | 311 (11.0%)                | 462 (11.7%)                                 | 1,633 (19.7%)              | 2,184 (17.9%)                                | 373 (22.1%)                | 416 (18.0%)                                 |
| Non-Squamous                           | 2,524 (89.0%)              | 3,476 (88.3%)                               | 6,657 (80.3%)              | 10,006 (82.1%)                               | 1,318 (77.9%)              | 1,897 (82.0%)                               |
| Underlying conditions                  |                            |                                             |                            |                                              |                            |                                             |
| Hypertension                           | 835 (29.5%)                | 1,050 (26.7%)                               | 4,023 (48.5%)              | 5,190 (42.6%)                                | 951 (56.2%)                | 1,217 (52.6%)                               |

|                             |               |               |               |               |               |               |
|-----------------------------|---------------|---------------|---------------|---------------|---------------|---------------|
| Diabetes mellitus           | 403 (14.2%)   | 524 (13.3%)   | 1,906 (23.0%) | 2,955 (24.2%) | 400 (23.7%)   | 595 (25.7%)   |
| Renal failure               | 67 (2.4%)     | 58 (1.5%)     | 389 (4.7%)    | 442 (3.6%)    | 135 (8.0%)    | 131 (5.7%)    |
| Liver failure               | 475 (16.8%)   | 521 (13.2%)   | 1,423 (17.2%) | 1,823 (15.0%) | 300 (17.7%)   | 362 (15.7%)   |
| Cardiovascular disease      | 634 (22.4%)   | 744 (18.9%)   | 2,891 (34.9%) | 3,713 (30.5%) | 747 (44.2%)   | 899 (38.9%)   |
| Dyslipidemia                | 384 (13.5%)   | 522 (13.3%)   | 2,261 (27.3%) | 2,969 (24.4%) | 531 (31.4%)   | 682 (29.5%)   |
| Medication                  |               |               |               |               |               |               |
| Immunosuppressant           | 21 (0.7%)     | 113 (2.9%)    | 70 (0.8%)     | 345 (2.8%)    | 20 (1.2%)     | 54 (2.3%)     |
| Calendar dates of therapies |               |               |               |               |               |               |
| 2015/12/01–2019/12/31       | 1,030 (36.3%) | 2,794 (70.9%) | 2,717 (32.8%) | 7,834 (64.3%) | 545 (32.2%)   | 1,303 (56.3%) |
| 2020/01/01–2023/01/31       | 1,805 (63.7%) | 1,144 (29.1%) | 5,573 (67.2%) | 4,356 (35.7%) | 1,146 (67.8%) | 1,010 (43.7%) |

Abbreviations: NSCLC, non-small cell lung cancer; ICI, Immune checkpoint inhibitor; SD, standard deviation; BMI, body mass index; CCI, Charlson comorbidity index

**eTable 5.** Characteristics of patients with NSCLC categorized according to sex

|                                     | Male                        |                                              | Female                     |                                             |
|-------------------------------------|-----------------------------|----------------------------------------------|----------------------------|---------------------------------------------|
|                                     | ICI therapy<br>(n = 10,287) | Conventional<br>chemotherapy<br>(n = 14,139) | ICI therapy<br>(n = 2,529) | Conventional<br>chemotherapy<br>(n = 4,302) |
| Patient characteristics             | No. (%)                     | No. (%)                                      | No. (%)                    | No. (%)                                     |
| Age, mean (SD), y                   | 70.3 (8.9)                  | 70.4 (8.6)                                   | 70.1 (9.8)                 | 69.5 (9.9)                                  |
| BMI, mean (SD), kg/m <sup>2</sup>   | 22.0 (3.4)                  | 22.2 (3.4)                                   | 21.6 (3.9)                 | 21.9 (4.0)                                  |
| Smoking status (current/past)       | 8,912 (89.7%)               | 12,117 (89.4%)                               | 1,205 (49.2%)              | 1,676 (40.0%)                               |
| Barthel index score (perfect score) | 8,826 (89.5%)               | 12,305 (90.5%)                               | 2,067 (86.5%)              | 3,722 (89.6%)                               |
| CCI score                           |                             |                                              |                            |                                             |
| 0–2                                 | 3,445 (33.5%)               | 5,938 (42.0%)                                | 923 (36.5%)                | 1,921 (44.7%)                               |
| ≥ 3                                 | 6,842 (66.5%)               | 8,201 (58.0%)                                | 1,606 (63.5%)              | 2,381 (55.3%)                               |
| Histology of NSCLC                  |                             |                                              |                            |                                             |
| Squamous                            | 1,993 (19.4%)               | 2,673 (18.9%)                                | 324 (12.8%)                | 389 (9.0%)                                  |
| Non-Squamous                        | 8,294 (80.6%)               | 11,466 (81.1%)                               | 2,205 (87.2%)              | 3,913 (91.0%)                               |
| Underlying conditions               |                             |                                              |                            |                                             |
| Hypertension                        | 4,778 (46.4%)               | 5,844 (41.3%)                                | 1,031 (40.8%)              | 1,613 (37.5%)                               |
| Diabetes mellitus                   | 2,343 (22.8%)               | 3,431 (24.3%)                                | 366 (14.5%)                | 643 (14.9%)                                 |
| Renal failure                       | 512 (5.0%)                  | 534 (3.8%)                                   | 79 (3.1%)                  | 97 (2.3%)                                   |
| Liver failure                       | 1,810 (17.6%)               | 2,096 (14.8%)                                | 388 (15.3%)                | 610 (14.2%)                                 |
| Cardiovascular disease              | 3,556 (34.6%)               | 4,307 (30.5%)                                | 716 (28.3%)                | 1,049 (24.4%)                               |
| Dyslipidemia                        | 2,555 (24.8%)               | 3,150 (22.3%)                                | 621 (24.6%)                | 1,023 (23.8%)                               |

|                             |               |               |               |               |
|-----------------------------|---------------|---------------|---------------|---------------|
| Medication                  |               |               |               |               |
| Immunosuppressant           | 84 (0.8%)     | 299 (2.1%)    | 27 (1.1%)     | 213 (5.0%)    |
| Calendar dates of therapies |               |               |               |               |
| 2015/12/01–2019/12/31       | 3,437 (33.4%) | 9,289 (65.7%) | 855 (33.8%)   | 2,642 (61.4%) |
| 2020/01/01–2023/01/31       | 6,850 (66.6%) | 4,850 (34.3%) | 1,674 (66.2%) | 1,660 (38.6%) |

---

Abbreviations: NSCLC, non-small cell lung cancer; ICI, Immune checkpoint inhibitor; SD, standard deviation; BMI, body mass index; CCI, Charlson comorbidity index

---

**eTable 6.** Characteristics of patients with NSCLC categorized according to details on therapy types

| Patient characteristics                | Chemoimmunotherapy combinations<br>(n = 7,847) | ICI monotherapy<br>(n = 4,969) | Conventional chemotherapy<br>(n = 18,441) |
|----------------------------------------|------------------------------------------------|--------------------------------|-------------------------------------------|
|                                        | No. (%)                                        | No. (%)                        | No. (%)                                   |
| Age, mean (SD), y                      | 68.2 (8.7)                                     | 73.5 (8.8)                     | 70.2 (8.9)                                |
| BMI, mean (SD), kg/m <sup>2</sup>      | 22.1 (3.5)                                     | 21.7 (3.5)                     | 22.1 (3.5)                                |
| Sex                                    |                                                |                                |                                           |
| Male                                   | 6,355 (81.0%)                                  | 3,932 (79.1%)                  | 14,139 (76.7%)                            |
| Female                                 | 1,492 (19.0%)                                  | 1,037 (20.9%)                  | 4,302 (23.3%)                             |
| Smoking status (current/past)          | 6,277 (82.6%)                                  | 3,840 (80.3%)                  | 13,793 (77.7%)                            |
| Barthel index score<br>(perfect score) | 6,910 (91.4%)                                  | 3,983 (84.8%)                  | 16,027 (90.3%)                            |
| CCI score                              |                                                |                                |                                           |
| 0–2                                    | 2,654 (33.8%)                                  | 1,714 (34.5%)                  | 7,859 (42.6%)                             |
| ≥ 3                                    | 5,193 (66.2%)                                  | 3,255 (65.5%)                  | 10,582 (57.4%)                            |
| Histology of NSCLC                     |                                                |                                |                                           |
| Squamous                               | 1,383 (17.6%)                                  | 934 (18.8%)                    | 3,062 (16.6%)                             |
| Non-Squamous                           | 6,464 (82.4%)                                  | 4,035 (81.2%)                  | 15,379 (83.4%)                            |
| Underlying conditions                  |                                                |                                |                                           |
| Hypertension                           | 3,469 (44.2%)                                  | 2,340 (47.1%)                  | 7,457 (40.4%)                             |
| Diabetes mellitus                      | 1,602 (20.4%)                                  | 1,107 (22.3%)                  | 4,074 (22.1%)                             |
| Renal failure                          | 252 (3.2%)                                     | 339 (6.8%)                     | 631 (3.4%)                                |

|                             |               |               |                |
|-----------------------------|---------------|---------------|----------------|
| Liver failure               | 1,389 (17.7%) | 809 (16.3%)   | 2,706 (14.7%)  |
| Cardiovascular disease      | 2,458 (31.3%) | 1,814 (36.5%) | 5,356 (29.0%)  |
| Dyslipidemia                | 1,846 (23.5%) | 1,330 (26.8%) | 4,173 (22.6%)  |
| Medication                  |               |               |                |
| Immunosuppressant           | 63 (0.8%)     | 48 (1.0%)     | 512 (2.8%)     |
| Calendar dates of therapies |               |               |                |
| 2015/12/01–2019/12/31       | 1,814 (23.1%) | 2,478 (49.9%) | 11,931 (64.7%) |
| 2020/01/01–2023/01/31       | 6,033 (76.9%) | 2,491 (50.1%) | 6,510 (35.3%)  |

---

Abbreviations: NSCLC, non-small cell lung cancer; ICI, Immune checkpoint inhibitor; SD, standard deviation; BMI, body mass index; CCI, Charlson comorbidity index

---



**eTable 7.** Characteristics of NSCLC patients with and without BMI values

|                                   | Without BMI values          | With BMI values            | Without BMI values                           | With BMI values                             |
|-----------------------------------|-----------------------------|----------------------------|----------------------------------------------|---------------------------------------------|
|                                   | ICI therapy<br>(n = 12,816) | ICI therapy<br>(n = 1,744) | Conventional<br>chemotherapy<br>(n = 18,441) | Conventional<br>chemotherapy<br>(n = 2,952) |
| Patient characteristics           | No. (%)                     | No. (%)                    | No. (%)                                      | No. (%)                                     |
| Age, mean (SD), y                 | 70.2 (9.1)                  | 70.1 (10.0)                | 70.2 (8.9)                                   | 70.0 (9.5)                                  |
| BMI, mean (SD), kg/m <sup>2</sup> | 21.9 (3.5)                  | —                          | 22.1 (3.5)                                   | —                                           |
| Sex                               |                             |                            |                                              |                                             |
| Male                              | 10,287 (80.3%)              | 1,382 (79.2%)              | 14,139 (76.7%)                               | 1,959 (66.4%)                               |
| Female                            | 2,529 (19.7%)               | 362 (20.8%)                | 4,302 (23.3%)                                | 993 (33.6%)                                 |
| Smoking status (current/past)     | 10,117 (81.7%)              | 1,108 (77.6%)              | 13,793 (77.7%)                               | 1,719 (65.5%)                               |
| Barthel index (perfect score)     | 10,893 (88.9%)              | 489 (76.8%)                | 16,027 (90.3%)                               | 935 (82.7%)                                 |
| CCI                               |                             |                            |                                              |                                             |
| 0–2                               | 4,368 (34.1%)               | 659 (37.8%)                | 7,859 (42.6%)                                | 1,211 (41.0%)                               |
| ≥ 3                               | 8,448 (65.9%)               | 1,085 (62.2%)              | 10,582 (57.4%)                               | 1,741 (59.0%)                               |
| Histology of NSCLC                |                             |                            |                                              |                                             |
| Squamous cell carcinoma           | 2,317 (18.1%)               | 305 (17.5%)                | 3,062 (16.6%)                                | 281 (9.5%)                                  |
| Non-Squamous cell carcinoma       | 10,499 (81.9%)              | 1,439 (82.5%)              | 15,379 (83.4%)                               | 2,671 (90.5%)                               |
| Underlying conditions             |                             |                            |                                              |                                             |
| Hypertension                      | 5,809 (45.3%)               | 731 (41.9%)                | 7,457 (40.4%)                                | 1,232 (41.7%)                               |
| Diabetes mellitus                 | 2,709 (21.1%)               | 291 (16.7%)                | 4,074 (22.1%)                                | 554 (18.8%)                                 |
| Renal failure                     | 591 (4.6%)                  | 77 (4.4%)                  | 631 (3.4%)                                   | 101 (3.4%)                                  |

|                             |               |               |                |               |
|-----------------------------|---------------|---------------|----------------|---------------|
| Liver failure               | 2,198 (17.2%) | 260 (14.9%)   | 2,706 (14.7%)  | 525 (17.8%)   |
| Cardiovascular disease      | 4,272 (33.3%) | 518 (29.7%)   | 5,356 (29.0%)  | 931 (31.5%)   |
| Dyslipidemia                | 3,176 (24.8%) | 372 (21.3%)   | 4,173 (22.6%)  | 627 (21.2%)   |
| Medication                  |               |               |                |               |
| Immunosuppressant           | 111 (0.9%)    | 15 (0.9%)     | 512 (2.8%)     | 113 (3.8%)    |
| Calendar dates of therapies |               |               |                |               |
| 2015/12/01-2019/12/31       | 4,292 (33.5%) | 557 (31.9%)   | 11,931 (64.7%) | 1,641 (55.6%) |
| 2020/01/01-2023/01/31       | 8,524 (66.5%) | 1,187 (68.1%) | 6,510 (35.3%)  | 1,311 (44.4%) |

---

Abbreviations: NSCLC, non-small cell lung cancer; ICI, Immune checkpoint inhibitor; SD, standard deviation; BMI, body mass index; CCI, Charlson comorbidity index

---

**eFigure 1. Distribution of BMI**

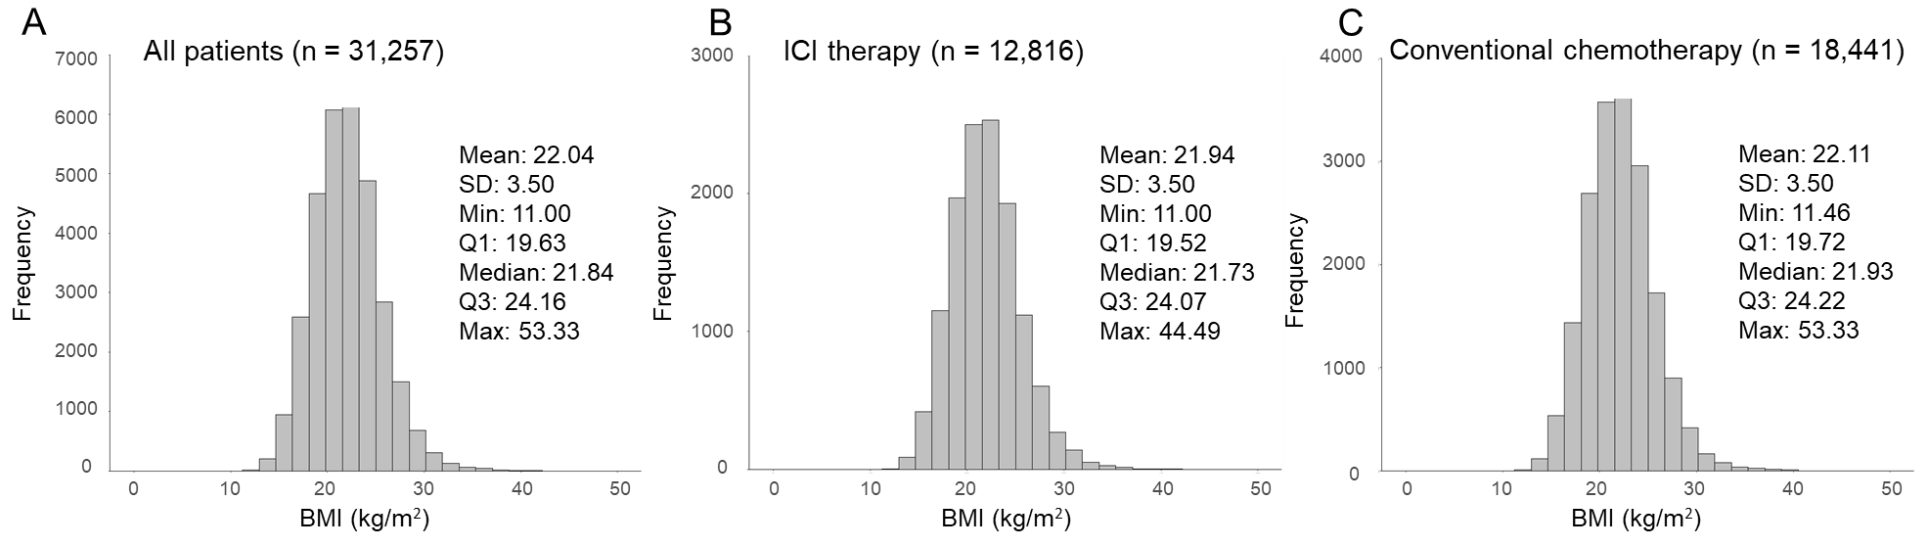

Abbreviations: BMI, body mass index; SD, standard deviation; Q1, first quartile; Q3, third quartile; Min, minimum; Max, maximum

**eFigure 2.** Hazard functions of mortality for patients who received ICI therapy or conventional chemotherapy and difference of hazard of mortality plotted against BMI in sensitivity analyses

Sensitivity analysis 1 on length of period before lung cancer

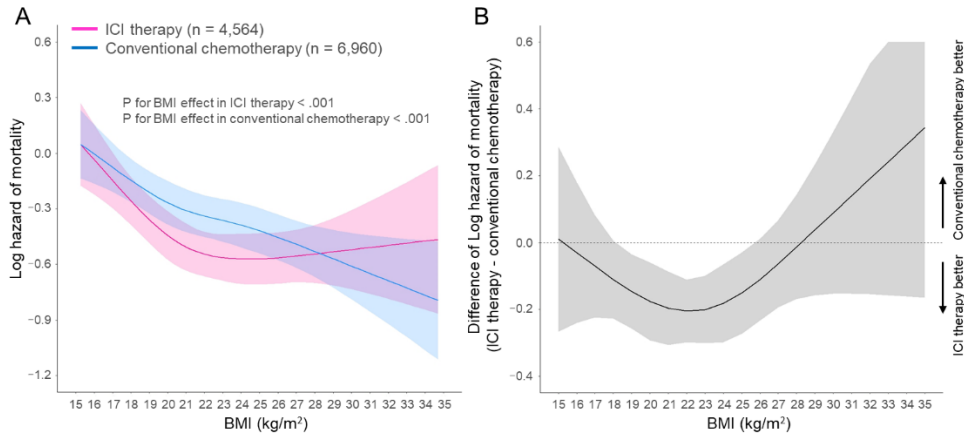

Sensitivity analysis 2 with censoring at time of regimen cross-over

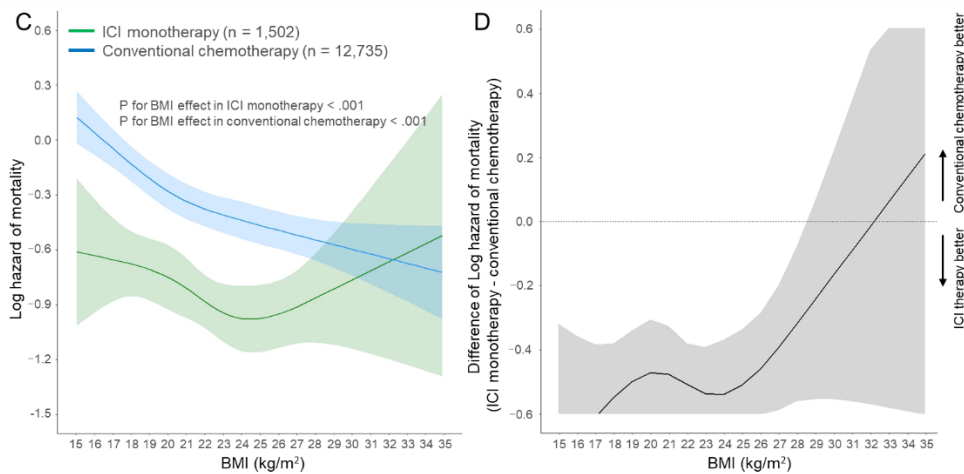

Sensitivity analysis 3 in missing value completion of BMI

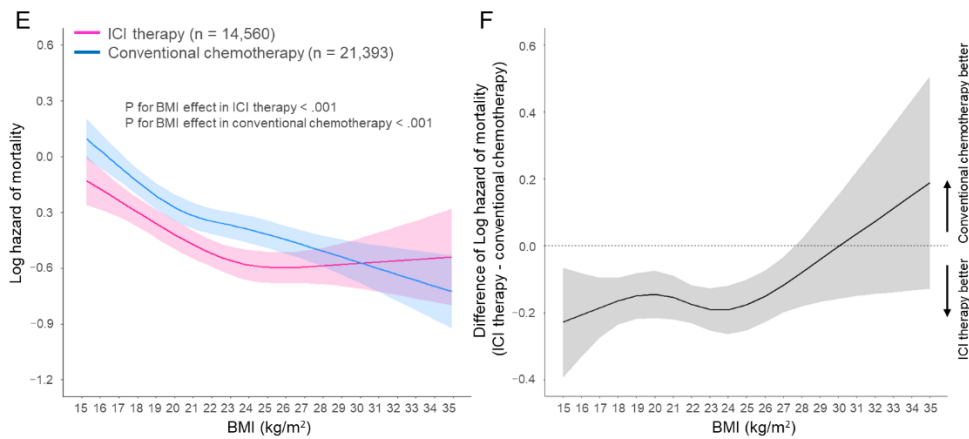

eFigure 2 shows the log of the mortality hazard as a function of BMI, stratified by therapeutic type in sensitivity analysis 1, sensitivity analysis 2 and sensitivity analysis 3 populations. A consistent trend was associated with a lower hazard of mortality for patients with a higher BMI in both therapy types for all sensitivity analyses (eFigure 2A, 2C, 2E). However, in sensitivity analysis 2, the mortality hazard was higher for patients with higher BMI. The association of lower mortality in patients treated with ICI compared with those treated with conventional chemotherapy was observed to disappear before and after overweight or obesity in all sensitivity analyses (eFigure2B, 2D, 2F).

Abbreviations: BMI, body mass index; ICI, Immune checkpoint inhibitors

**eFigure 3.** Hazard of mortality as a function of BMI stratified based on details on therapy types

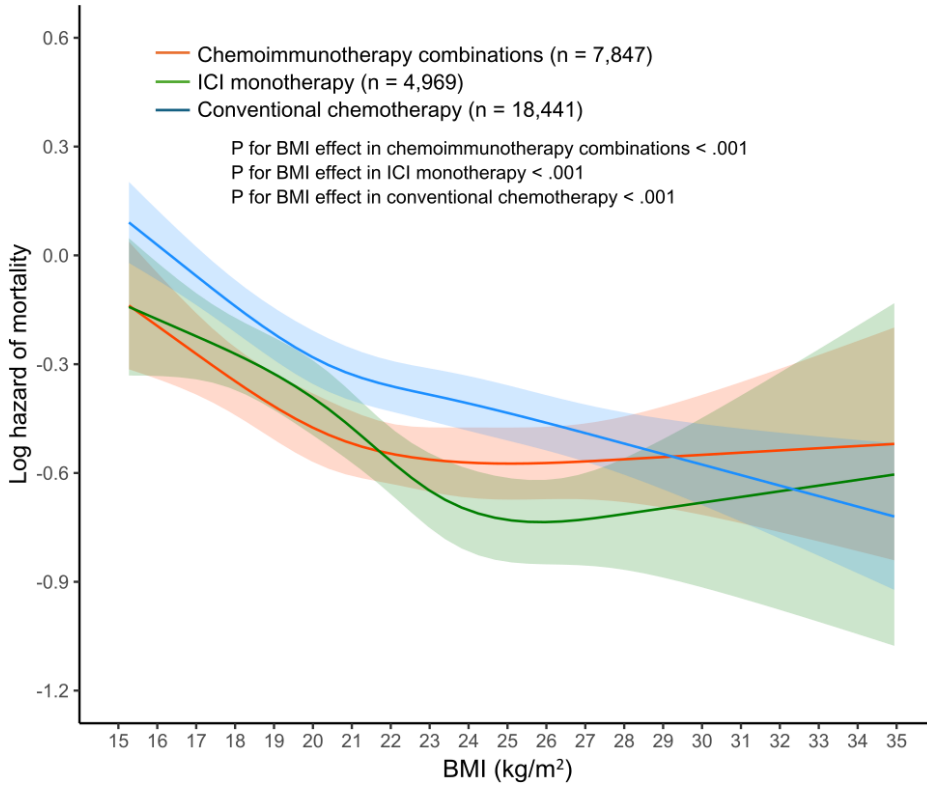

eFigure 3 details the log of the mortality hazard as a function of BMI stratified by therapy type, comparing ICI monotherapy and a combination of ICI and chemotherapy. In patients who are overweight or obese, receiving ICI monotherapy or chemoimmunotherapy combinations was not associated with a lower risk of mortality compared to those receiving conventional chemotherapy.

Abbreviations: BMI, body mass index; ICI, Immune checkpoint inhibitors
