# Supplementary material for: Immunotherapy and Overall Survival Among Patients With Advanced Non–Small Cell Lung Cancer and Obesity
Source: PubMed Central journal article supplement (PMC11297387; doi:10.1001/jamanetworkopen.2024.25363), 2024-08-02
Supplement: jamanetwopen-e2425363-s002.pdf [file jamanetwopen-e2425363-s002.pdf]

## Data Sharing Statement

Ihara. Immunotherapy and Overall Survival Among Patients With Advanced Non–Small Cell Lung Cancer and Obesity. *JAMA Netw Open*. Published August 02, 2024.

doi:10.1001/jamanetworkopen.2024.25363

### Data

**Data available:** No

### Additional Information

**Explanation for why data not available:** The database provided by Medical Data Vision Co., Ltd. was used under a license agreement and is not publicly available.
